# Supplementary material
Source: Springer Nature journal article supplement (https://www.springermedizin.de/resource/supplementary/13737_2012_14_MOESM2_ESM.pdf/9682108)

### Proteins associated with immune proteins

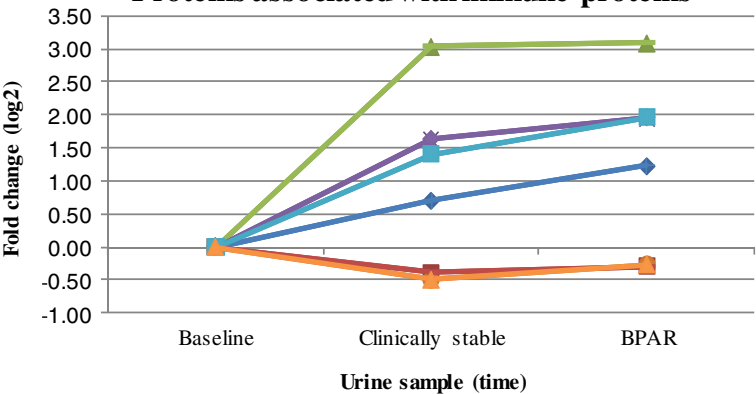

### Proteins associated with growth factors

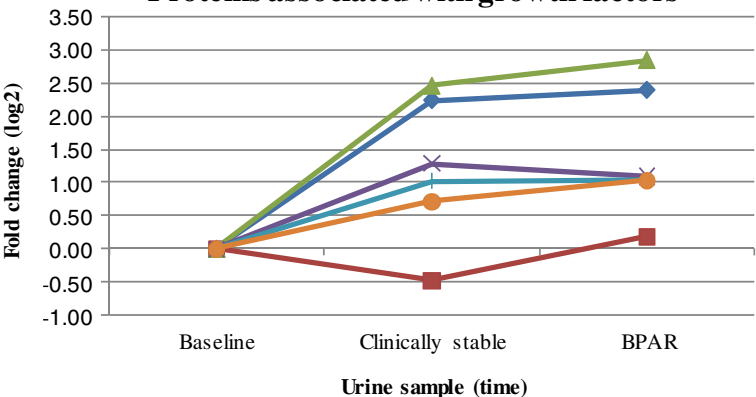

### Misc. (MEP1A)

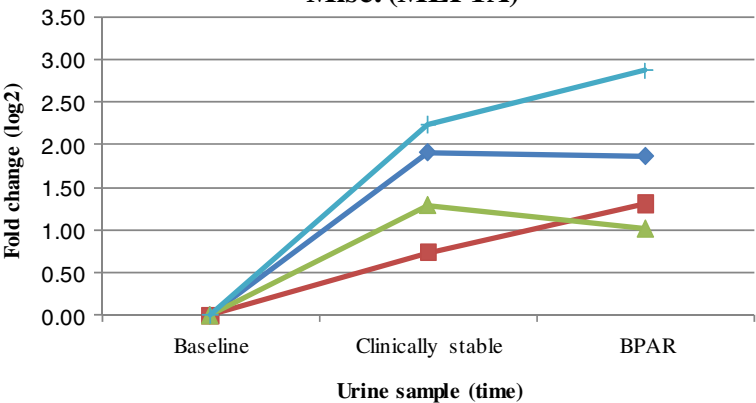

Supplement: MOESM2 [file 9682108]
